# Supplementary material
Source: PubMed Central journal article supplement (PMC4625670)

**Supplementary Table 1. Univariate Analysis of Clinical Factors Influencing PIGF**

|                                      | <b>Coefficient</b> | <b>95% CI</b> | <b>P</b> |
|--------------------------------------|--------------------|---------------|----------|
| <b>Demographics and Risk Factors</b> |                    |               |          |
| Age ( $\geq 65$ y)                   | 2.37               | 1.51 to 3.24  | < 0.0001 |
| Sex (male)                           | 0.30               | -0.59 to 1.20 | 0.51     |
| Diabetes                             | 1.76               | 0.81 to 2.70  | 0.0003   |
| Hypertension                         | 2.49               | 1.60 to 3.38  | < 0.0001 |
| Dyslipidemia                         | -0.08              | -0.97 to 0.81 | 0.86     |
| Smoking                              | 0.89               | 0.02 to 1.77  | 0.045    |
| Obesity                              | -0.20              | -1.15 to 0.75 | 0.68     |
| CKD (stage difference)               | 1.38               | 1.16 to 1.61  | < 0.0001 |
| Previous CAD                         | 1.27               | 0.17 to 2.38  | 0.024    |
| Previous stroke                      | 3.25               | 1.50 to 4.99  | 0.0003   |
| <b>Current Medications</b>           |                    |               |          |
| RAS blocker                          | 0.85               | 0.06 to 1.73  | 0.06     |
| CCB                                  | 1.41               | 0.50 to 2.32  | 0.0024   |
| $\beta$ blocker                      | 1.53               | 0.30 to 2.76  | 0.015    |
| MR antagonist                        | 0.77               | -1.03 to 2.56 | 0.40     |
| Lipid-lowering agent                 | 0.24               | -0.80 to 1.29 | 0.65     |
| Diuretic                             | 1.79               | 0.76 to 2.82  | 0.0007   |
| Antiplatelet agent                   | 2.49               | 1.55 to 3.42  | < 0.0001 |
| <b>Laboratory Results</b>            |                    |               |          |

|                              |       |               |          |
|------------------------------|-------|---------------|----------|
| Hemoglobin (<10.0 g/dL)      | 4.03  | 2.84 to 5.23  | < 0.0001 |
| Albumin (<3.0 mg/dL)         | 3.29  | 2.12 to 4.45  | < 0.0001 |
| Calcium (>10.0 mg/dL)        | 0.97  | -0.62 to 2.56 | 0.23     |
| Phosphorus (>4.5 mg/dL)      | 2.56  | 1.37 to 3.75  | < 0.0001 |
| CRP (>0.2 mg/dL)             | 3.12  | 2.26 to 3.98  | < 0.0001 |
| HbA1c (≥6.5 %)               | 0.26  | -0.79 to 1.31 | 0.63     |
| LDL cholesterol (≥140 mg/dL) | -0.15 | -1.12 to 0.83 | 0.77     |
| HDL cholesterol (<40 mg/dL)  | 3.44  | 2.34 to 4.55  | < 0.0001 |
| Triglycerides (≥150 mg/dL)   | 0.35  | -0.58 to 1.29 | 0.46     |

---

**Supplementary Table 2. Multivariate Analysis of Clinical Factors Influencing PIGF**

|                                      | <b>Coefficient</b> | <b>95% CI</b> | <b>P</b> |
|--------------------------------------|--------------------|---------------|----------|
| <b>Demographics and Risk Factors</b> |                    |               |          |
| Age ( $\geq 65$ y)                   | 0.43               | -0.38 to 1.25 | 0.30     |
| Diabetes                             | 0.31               | -0.54 to 1.17 | 0.47     |
| Hypertension                         | 0.63               | -0.34 to 1.61 | 0.20     |
| Smoking                              | -0.14              | -0.91 to 0.64 | 0.73     |
| CKD (stage difference)               | 0.81               | 0.55 to 1.08  | < 0.0001 |
| Previous CAD                         | -0.33              | -1.50 to 0.84 | 0.58     |
| Previous stroke                      | 0.62               | -0.85 to 2.09 | 0.41     |
| <b>Current Medications</b>           |                    |               |          |
| RAS blocker                          | -0.54              | -1.38 to 0.30 | 0.21     |
| CCB                                  | -0.33              | -1.22 to 0.55 | 0.46     |
| $\beta$ blocker                      | 0.21               | -0.89 to 1.32 | 0.71     |
| Diuretic                             | -0.07              | -0.99 to 0.85 | 0.88     |
| Antiplatelet agent                   | 1.48               | 0.48 to 2.49  | 0.004    |
| <b>Laboratory Results</b>            |                    |               |          |
| Hemoglobin (<10.0 g/dL)              | 0.73               | -0.36 to 1.81 | 0.19     |
| Albumin (<3.0 g/dL)                  | 2.99               | 1.97 to 4.00  | < 0.0001 |
| Phosphorus (>4.5 mg/dL)              | -0.35              | -1.44 to 0.74 | 0.53     |
| CRP (>2.0 mg/dL)                     | 1.47               | 0.68 to 2.26  | 0.005    |
| HDL cholesterol (<40 mg/dL)          | 1.78               | 0.81 to 2.74  | < 0.0001 |

**Supplementary Table 3. Risk of Atherosclerotic Disease and Heart Failure by baseline PIGF level**

|                                | Unadjusted       | Model 1          | Model 2          | Model 3          | Model 4          | Model 5          |
|--------------------------------|------------------|------------------|------------------|------------------|------------------|------------------|
| <b>Atherosclerotic Disease</b> |                  |                  |                  |                  |                  |                  |
| Quartile 1                     | 1.0 (Ref)        |
| Quartile 2                     | 1.57 (0.91–2.76) | 1.26 (0.78–2.22) | 1.24 (0.71–2.20) | 1.17 (0.66–2.10) | 1.33 (0.73–2.45) | 1.57 (0.91–2.76) |
| Quartile 3                     | 3.45 (2.15–5.78) | 2.56 (1.59–4.30) | 2.45 (1.51–4.14) | 2.39 (1.48–4.04) | 2.29 (1.39–3.92) | 3.45 (2.15–5.78) |
| Quartile 4                     | 8.23 (5.31–13.4) | 6.51 (4.18–10.7) | 4.97 (3.12–8.28) | 5.18 (3.25–8.65) | 6.69 (4.09–11.4) | 8.23 (5.31–13.4) |
| for each 10 pg/mL increase     | 1.95 (1.75–2.16) | 1.91 (1.70–2.14) | 1.84 (1.61–2.09) | 1.79 (1.57–2.04) | 1.90 (1.65–2.18) | 1.95 (1.75–2.16) |
| <b>Heart Failure</b>           |                  |                  |                  |                  |                  |                  |
| Quartile 1                     | 1.0 (Ref)        |
| Quartile 2                     | 2.64 (1.15–6.79) | 2.05 (0.89–5.29) | 1.94 (0.83–5.05) | 2.46 (1.00–6.74) | 3.12 (1.21–9.02) | 2.64 (1.15–6.79) |
| Quartile 3                     | 8.16 (3.97–19.7) | 5.94 (2.87–14.4) | 5.42 (2.60–13.2) | 6.09 (2.89–15.0) | 6.15 (2.79–15.7) | 8.16 (3.97–19.7) |
| Quartile 4                     | 16.7 (8.34–39.6) | 13.2 (6.54–31.4) | 11.9 (5.81–28.6) | 12.4 (6.09–30.0) | 10.6 (5.17–25.7) | 16.7 (8.34–39.6) |
| for each 10 pg/mL increase     | 1.98 (1.76–2.20) | 1.96 (1.73–2.20) | 1.80 (1.57–2.05) | 1.85 (1.60–2.13) | 1.70 (1.44–1.96) | 1.98 (1.76–2.20) |

Model 1 adjusted for age and sex. Model 2 adjusted for covariates in Model 1 plus risk factors including diabetes, hypertension, dyslipidemia, obesity, smoking, previous coronary artery disease, previous stroke, and CKD stage. Model 3 adjusted for covariates in Model 2 plus current medications including renin angiotensin system blockers, calcium channel blockers,  $\beta$  blockers, mineralocorticoid receptor antagonists, lipid-lowering agents, diuretics, and antiplatelet agents. Model 4 adjusted for covariates in Model 3 plus laboratory data including hemoglobin, serum albumin, serum calcium, phosphorus, serum C-reactive protein, HbA1c, LDL cholesterol, HDL cholesterol, and triglycerides. Model 5 adjusted

for covariates in Model 4 plus BNP.

Supplementary Figure 1. Kaplan-Meier curves for All-cause mortality and Cardiovascular events by Baseline PIGF Quartile

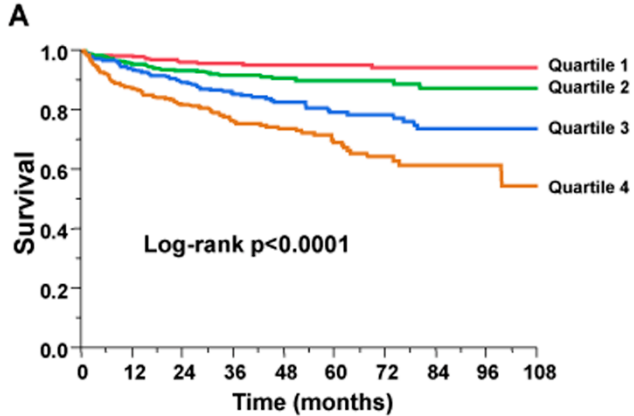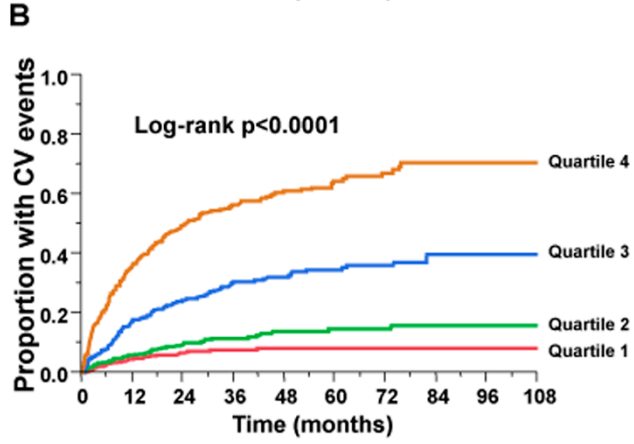

Supplementary Figure 2. Kaplan-Meier curves for All-cause mortality and Cardiovascular events by Baseline VEGF Quartile

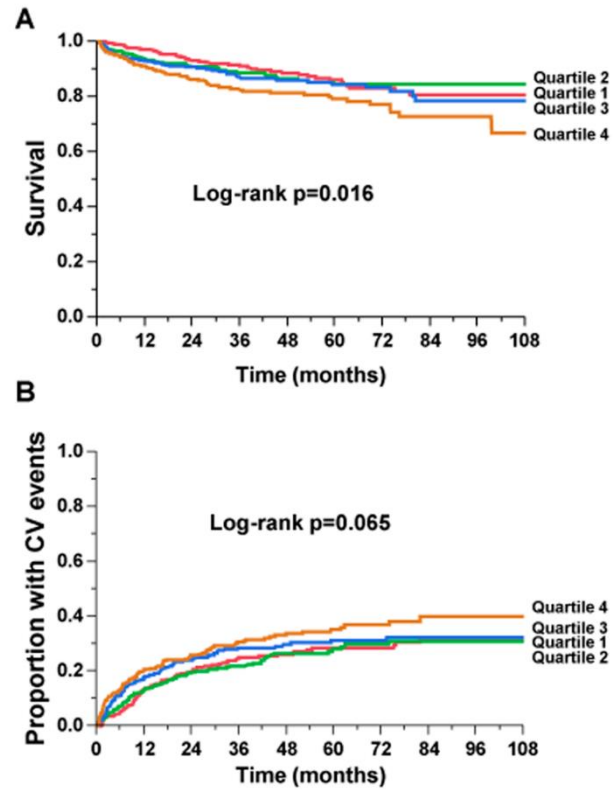

Supplementary Figure 3. Kaplan-Meier curves for Atherosclerotic Disease and Heart Failure by Baseline PIGF Quartile

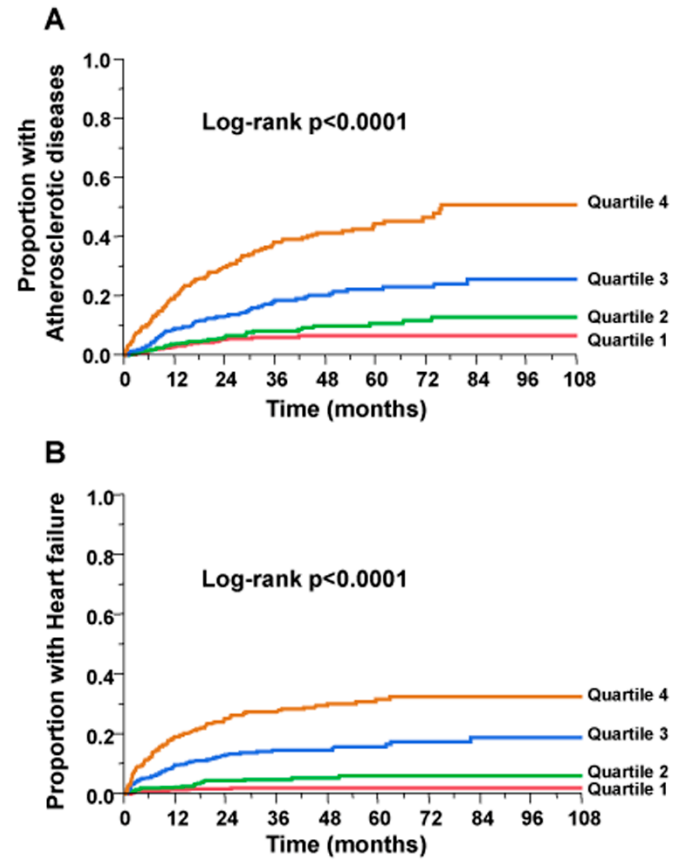



**Supplementary Figure 4. Prognostic value of PIGF, BNP versus combination use of PIGF and BNP on All-cause mortality and Cardiovascular events.**

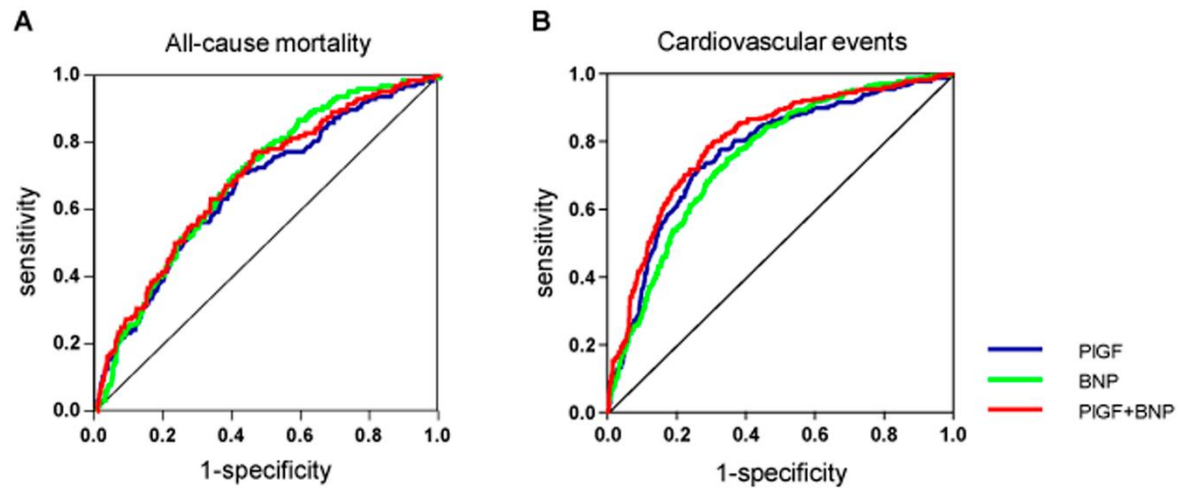

Supplement: ASN.2014080772_ASN2014080772SupplementaryData.pdf [file ASN.2014080772_ASN2014080772SupplementaryData.pdf]
